# Supplementary material for: Pre-Transplant Prediction of Acute Graft-versus-Host Disease Using the Gut Microbiome
Source: MDPI journal article supplement (doi:10.3390/cells11244089), 2022-12-16
Supplement: s1 [file s1]

# Supplementary material to Pre-transplant prediction of acute graft-versus-host disease using the gut microbiome

## Contents

|                                                                                                                              |   |
|------------------------------------------------------------------------------------------------------------------------------|---|
| Supplementary material to <b>Pre-transplant prediction of acute graft-versus-host disease using the gut microbiome</b> ..... | 1 |
| Supplementary methods .....                                                                                                  | 1 |
| Supplementary details of the taxonomic classification methods .....                                                          | 1 |
| DeepMicrobes: a deep learning approach for taxonomic classification .....                                                    | 1 |
| Kaiju and Kraken2 .....                                                                                                      | 2 |
| Normalization of the species abundances.....                                                                                 | 2 |
| Supplementary figures .....                                                                                                  | 2 |
| Supplementary tables.....                                                                                                    | 3 |

## Supplementary methods

Metagenomic study of the gut microbiome allows analysis of the genetic contents of a sample without isolating and culturing microorganisms<sup>1</sup>. As a common process, a fecal sample is collected from a patient followed by extracting its sequenced reads of Deoxyribonucleic acid (DNA) fragments. Further steps include taxonomic classification (after removing human DNA reads for ethical compliance) of the resulting metagenomic samples to specify the taxa-of-origin of the microorganisms in the gut microbiome using a model mapping the reads with sequences of known taxa from a reference database.

### Supplementary details of the taxonomic classification methods

Fig. 1 outlines the procedure used from stool sample collection to taxonomic classification of the metagenomic samples. There are also notions on key differences between the taxonomic classification methods used in this study with further explanations as follows.

#### DeepMicrobes: a deep learning approach for taxonomic classification

DeepMicrobes<sup>2</sup> has been found to be highly precise in taxonomic classification on species level<sup>2</sup>. It can classify (sequence) reads with different lengths in a metagenomic sample. Furthermore, DeepMicrobes allows taxonomic classification for newly discovered species without requiring a well-curated taxonomic tree. DeepMicrobes, as a deep neural network, is structured in four computational layers. It first translates sequences of  $k$  consecutive DNA base pairs ( $k$ -mers) to vectorized numerical representations in an embedding layer. A vocabulary, as a list of possible  $k$ -mers, is also built based on canonical  $k$ -mers, where replica and reverse complements of a sequence are removed from the vocabulary. The resulting  $k$ -mers ( $k=12$  in our study) are fed into bidirectional long short-term memory (BiLSTM). Long short-term memory (LSTM) is useful to learn long-term dependencies in a sequential data, thus, BiLSTM is a relevant choice to read sequences of  $k$ -mers in both directions in analogy to prediction of a missing word in a sentence. The output from BiLSTM is weighted using an attention mechanism that specifies which  $k$ -mers in a sequence of  $k$ -mers contain relevant information to predict species. The process is followed by an attention layer to determine

the read parts contributing the most to prediction of species. The output of the attention layer is forwarded to a multilayer perceptron to map a weighted vector generated by the attention layer to the species of origin. Each predicted/classified species thus corresponds to each read in the input sample. Each prediction is featured by a confidence score ranging 0-100%.

The confidence score is an estimated probability of the prediction's correctness using a Softmax layer implemented as the output layer of DeepMicrobes. The number of classified species (species counts) is dependent on the confidence score threshold, in which, increased threshold leads to decreased number of classified reads. Predicted species with confidence scores of >50 for DeepMicrobes were considered as classified.

DeepMicrobes has been developed using a custom database containing 2505 human gut species from complete bacterial repertoire of human gut microbiota. Many of these species are newly discovered via metagenome assembly. DeepMicrobes was downloaded from an online repository ([github.com/MicrobeLab/DeepMicrobes](https://github.com/MicrobeLab/DeepMicrobes)) and implemented using Python<sup>3</sup> (v3.7.4) and TensorFlow<sup>4</sup> (v2.1.0). The processing was performed using a local IBM high performance server (New York, United States) on two graphics processing units (Nvidia Tesla v100-SXM2-16GB) with POWER8 system architecture.

We followed the instructions of the [DeepMicrobes repository](#) to use a trained deep neural network called *attention*. In order to use this model from DeepMicrobes, *tfrec\_predict\_kmer.sh* function was first used for the transformation of FASTQ files to TFREC files (a binary format for TensorFlow compatibility). It was followed by the prediction of the species of the origin for the reads using *predict\_DeepMicrobes.sh* function.

## Kaiju and Kraken2

In addition to DeepMicrobes, two different and popular methods, namely, Kaiju<sup>5</sup> (v1.7.3) and Kraken2<sup>6</sup> (v2.1.2) were also used for the taxonomic classification. The same custom reference database from DeepMicrobes<sup>2</sup> was used for these two methods to compare the performance of pre-HSCT aGvHD predictions derived from DeepMicrobes' classified taxa with those of Kaiju and Kraken2. The taxonomic classification using Kraken2 and Kaiju were performed in a Linux environment on Computerome, the Danish National Computer for Life Sciences and High Performance Computing servers of PERSIMUNE/CHIP. In order to use Kraken2, we followed [Kraken2 manual](#) to build our custom database and used the confidence score of 0.1 for taxonomic classification. Similarly, Kaiju was implemented following the instructions for custom databases from its [software repository](#).

## Normalization of the species abundances

The normalization was done by dividing the counts of each species by their corresponding genome size from the reference database followed by division to total counts in that sample. The resulting values then were multiplied by 100 to sum each sample's normalized counts to 100 thereby making the samples comparable. The names for taxa features are from the custom reference database and their taxonomy information can be retrieved from [ftp://ftp.ebi.ac.uk/pub/databases/metagenomics/umgs\\_analyses/](ftp://ftp.ebi.ac.uk/pub/databases/metagenomics/umgs_analyses/)

## Supplementary figures

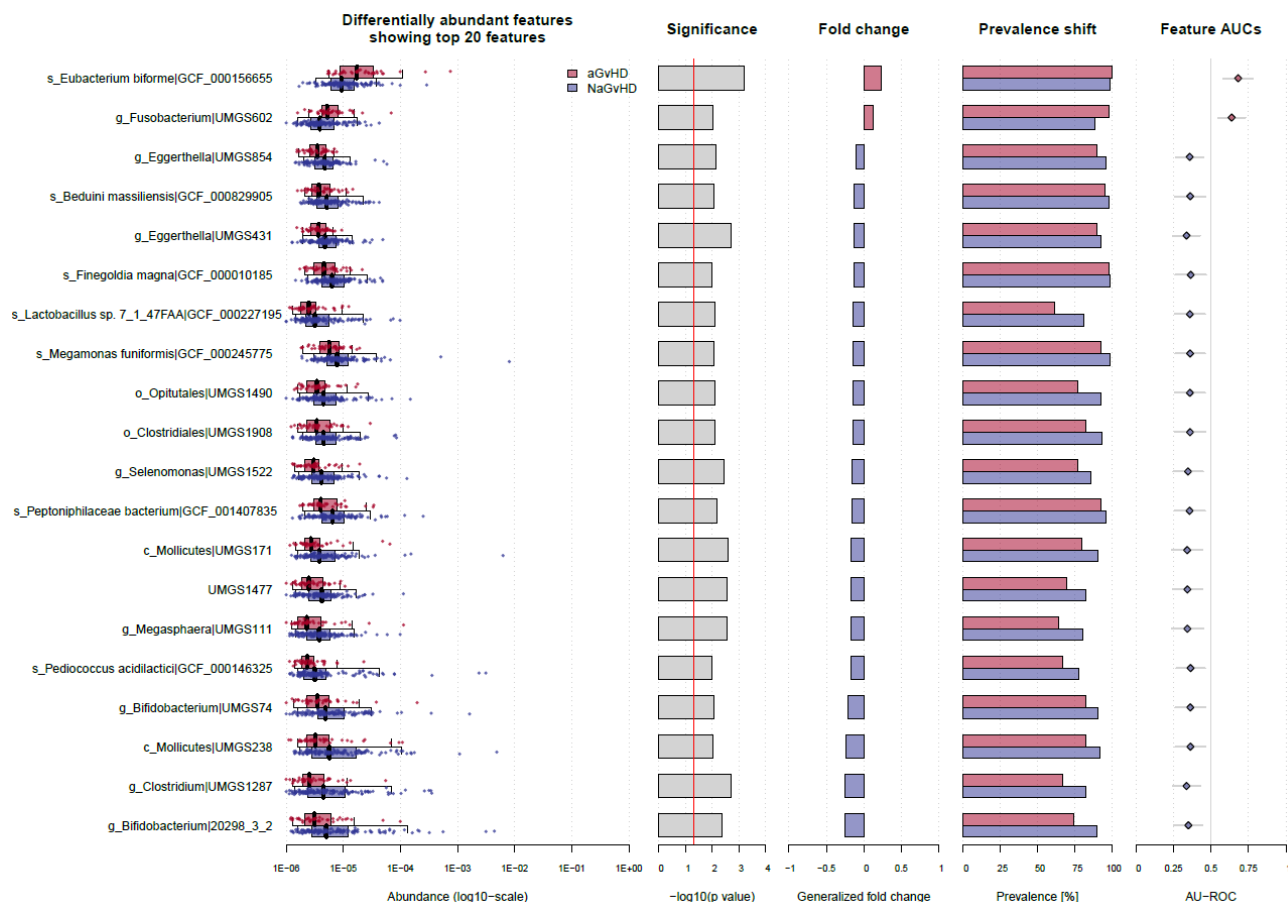

Supplementary Figure S1 abundances of the top-20 species contributing to the prediction of aGvHD as well as their associations with aGvHD and NaGvHD quantified in terms of generalized fold change, prevalence shift, and feature AUCs based on SIAMCAT package. Species names are formatted as beginning with their closest known taxonomy level assigned to them from s\_:species, g\_:genus, o\_:order, f\_:family, and c\_:class or none when there is no assigned name for the species followed by the species identifier from the reference database.

## Supplementary tables

Supplementary Table S1 study population including 172 patients of two groups: allogeneic hematopoietic stem cell transplantation (HSCT) recipients diagnosed with acute-versus host disease (aGvHD) and HSCT recipients without aGvHD (NaGvHD).

| Characteristic    | N = 172 <sup>1</sup> |
|-------------------|----------------------|
| aGvHD Class       |                      |
| NaGvHD            | 133 (77%)            |
| aGvHD             | 39 (23%)             |
| Conditioning      |                      |
| myeloablative     | 64 (37%)             |
| non myeloablative | 108 (63%)            |
| Cyclophosphamide  |                      |
| none              | 155 (90%)            |
| used              | 17 (9.9%)            |
| Disease Group     |                      |
| other             | 111 (65%)            |
| Acute leukemia    | 61 (35%)             |
| DR Relationship   |                      |
| unrelated         | 130 (76%)            |
| related           | 42 (24%)             |
| Donor Sex         |                      |
| M                 | 109 (63%)            |

|                   |           |
|-------------------|-----------|
| F                 | 63 (37%)  |
| Karnofsky D0      |           |
| 90<               | 112 (65%) |
| 90+               | 60 (35%)  |
| Radiation Group   |           |
| None              | 48 (28%)  |
| irradiated        | 124 (72%) |
| Recipient Age     |           |
| 60<               | 83 (48%)  |
| 60+               | 89 (52%)  |
| Recipient Sex     |           |
| M                 | 98 (57%)  |
| F                 | 74 (43%)  |
| Transplant Source |           |
| Bone marrow       | 16 (9.3%) |
| Peripheral blood  | 156 (91%) |

<sup>1</sup> n (%)

Abbreviations: D: donor, F: female, M: male, R: recipient.

Supplementary Table S2 Univariable logistic regression with aGvHD as dependent variable (NaGvHD:0, aGvHD:1) and clinical variables as predictors (features). Base (reference) and alternate levels for categorical features are mentioned. Number of samples were N=172 (39 aGvHD and 133 NaGvHD).

| Feature           | Base level        | Alternate level  | coefficient ( $\beta$ ) 95% CI | z val. | p     |
|-------------------|-------------------|------------------|--------------------------------|--------|-------|
| Conditioning      | non-myeloablative | myeloablative    | 0.619 (-0.104 1.343)           | 1.678  | 0.093 |
| Cyclophosphamide  | none              | used             | 0.394 (-0.717 1.504)           | 0.695  | 0.487 |
| Disease group     | acute leukemia    | other            | -0.308 (-1.04 0.424)           | -0.824 | 0.41  |
| DR relationship   | related           | unrelated        | 0.286 (-0.584 1.155)           | 0.644  | 0.519 |
| Donor sex         | male              | female           | 0.379 (-0.347 1.106)           | 1.023  | 0.306 |
| Karnofsky D0      | <90               | 90≥              | 0.201 (-0.538 0.939)           | 0.533  | 0.594 |
| Radiation group   | none              | irradiated       | -0.18 (-0.96 0.6)              | -0.453 | 0.651 |
| Recipient age     | <60               | 60≥              | -0.157 (-0.871 0.558)          | -0.43  | 0.667 |
| Recipient sex     | male              | female           | 0.164 (-0.553 0.882)           | 0.449  | 0.654 |
| Transplant source | bone marrow       | peripheral blood | -0.142 (-1.334 1.051)          | -0.233 | 0.816 |

Supplementary Table S3 list of 143 differentially abundant species according to the Wilcoxon's test. P values are not adjusted for multiple testing. Species are ordered by p values in ascending order.

| species <sup>1</sup>                        | p value <sup>2</sup> | effect size <sup>3</sup> |
|---------------------------------------------|----------------------|--------------------------|
| s_Eubacterium biforme GCF_000156655         | 0.001                | 1.67                     |
| g_Clostridium UMGS1287                      | 0.002                | -2.27                    |
| g_Eggerthella UMGS431                       | 0.002                | -0.87                    |
| UMGS1477                                    | 0.003                | -1.11                    |
| g_Megasphaera UMGS111                       | 0.003                | 0.12                     |
| c_Mollicutes UMGS171                        | 0.003                | -3.38                    |
| g_Bifidobacterium 20298_3_2                 | 0.004                | -3.51                    |
| g_Selenomonas UMGS1522                      | 0.004                | -1.06                    |
| s_Peptoniphilaceae bacterium GCF_001407835  | 0.007                | -0.87                    |
| g_Eggerthella UMGS854                       | 0.007                | -0.84                    |
| s_Lactobacillus sp. 7_1_47FAA GCF_000227195 | 0.008                | -1.32                    |
| o_Opitutales UMGS1490                       | 0.008                | -1.05                    |
| s_Megamonas funiformis GCF_000245775        | 0.008                | -3.68                    |
| s_Beduini massiliensis GCF_000829905        | 0.008                | -0.73                    |
| o_Clostridiales UMGS1908                    | 0.008                | -0.88                    |
| g_Bifidobacterium UMGS74                    | 0.009                | -1.35                    |
| g_Fusobacterium UMGS602                     | 0.009                | 0.50                     |
| c_Mollicutes UMGS238                        | 0.009                | -2.53                    |
| s_Finegoldia magna GCF_000010185            | 0.01                 | -0.70                    |
| s_Pediococcus acidilactici GCF_000146325    | 0.01                 | -4.45                    |

|                                              |       |       |
|----------------------------------------------|-------|-------|
| o_Clostridiales UMGS1411                     | 0.011 | -0.89 |
| g_Ruminococcus UMGS283                       | 0.011 | -1.81 |
| g_Bacteroides 13470_2_62                     | 0.012 | 0.66  |
| g_Garciella UMGS1857                         | 0.012 | -0.70 |
| g_Ruminococcus UMGS91                        | 0.012 | -2.95 |
| g_Megasphaera UMGS14                         | 0.014 | -3.40 |
| o_Clostridiales UMGS207                      | 0.014 | -2.61 |
| s_Collinsella stercoris GCF_000156215        | 0.014 | -0.87 |
| s_Lascolabacillus massiliensis GCF_001282625 | 0.014 | 0.45  |
| g_Ruminococcus UMGS136                       | 0.014 | -0.04 |
| o_Clostridiales UMGS821                      | 0.014 | -0.72 |
| c_Clostridia UMGS1322                        | 0.015 | -1.68 |
| s_Weissella paramesenteroides GCF_000160575  | 0.015 | -1.38 |
| s_Corynebacterium sp. SN15 GCF_900049755     | 0.015 | -0.51 |
| g_Ruminococcus UMGS200                       | 0.015 | -0.79 |
| o_Clostridiales UMGS509                      | 0.015 | -1.99 |
| c_Mollicutes UMGS914                         | 0.015 | -1.69 |
| c_Bacilli 21673_4_55                         | 0.016 | 0.26  |
| s_Bacillus timonensis GCF_000285535          | 0.016 | -0.89 |
| s_Bacillus sp. B-jedd GCF_000821085          | 0.016 | -0.09 |
| s_Veillonellaceae bacterium GCF_900095855    | 0.017 | -1.04 |
| g_Bifidobacterium UMGS1405                   | 0.017 | -1.17 |
| o_Clostridiales UMGS1470                     | 0.017 | -3.21 |
| f_Ruminococcaceae UMGS555                    | 0.017 | -1.10 |
| s_Thermoactinomyces bacterium GCF_000942395  | 0.017 | -0.59 |
| c_Mollicutes UMGS30                          | 0.017 | -1.79 |
| g_Prevotella UMGS2051                        | 0.018 | 0.68  |
| f_Ruminococcaceae UMGS677                    | 0.018 | -2.37 |
| o_Clostridiales UMGS807                      | 0.018 | -1.71 |
| g_Selenomonas 13414_6_12                     | 0.018 | -2.04 |
| g_Megasphaera UMGS20                         | 0.018 | -0.73 |
| g_Treponema UMGS419                          | 0.018 | -1.48 |
| s_Acidaminococcus sp. HPA0509 GCF_000411395  | 0.018 | -2.99 |
| f_Coriobacteriaceae UMGS165                  | 0.018 | -0.55 |
| g_Ruminococcus 20287_6_22                    | 0.019 | 0.79  |
| f_Ruminococcaceae UMGS1050                   | 0.02  | -3.06 |
| o_Clostridiales UMGS1290                     | 0.02  | -0.95 |
| f_Succinivibrionaceae UMGS157                | 0.02  | -0.88 |
| UMGS1305                                     | 0.021 | -0.69 |
| g_Anaerotruncus UMGS177                      | 0.021 | -0.73 |
| s_Actinomyces ihumii GCF_001457875           | 0.021 | -1.02 |
| f_Veillonellaceae UMGS1478                   | 0.021 | -0.59 |
| g_Fusobacterium UMGS539                      | 0.021 | -0.74 |
| s_Bacillus sp. JC6 GCF_000311725             | 0.022 | -0.97 |
| g_Bacteroides UMGS277                        | 0.022 | 2.17  |
| o_Clostridiales UMGS46                       | 0.023 | -0.02 |
| g_Ruminococcus UMGS1243                      | 0.023 | -0.67 |
| c_Mollicutes UMGS153                         | 0.023 | -1.56 |
| s_Parvimonas micra GCF_000154405             | 0.024 | -1.81 |
| f_Erysipelotrichaceae UMGS1249               | 0.024 | -0.78 |
| s_Bifidobacterium bifidum GCF_000273525      | 0.025 | -1.35 |
| p_Tenericutes UMGS1700                       | 0.025 | -1.42 |
| g_Cryptobacterium UMGS93                     | 0.025 | -0.66 |
| o_Clostridiales UMGS1034                     | 0.026 | -0.64 |
| o_Clostridiales UMGS83                       | 0.026 | -0.42 |
| s_Bacillus andreraoultii GCF_001244735       | 0.027 | -0.69 |
| s_Tessaracoccus massiliensis GCF_000826065   | 0.028 | -0.64 |
| s_Coriobacteriaceae bacterium GCF_000311845  | 0.028 | -3.75 |
| c_Clostridia UMGS2031                        | 0.028 | 0.40  |
| f_Veillonellaceae 20298_2_31                 | 0.028 | -2.79 |
| s_Lactobacillus brevis GCF_000159175         | 0.028 | -1.55 |
| s_Bifidobacterium angulatum GCF_001025155    | 0.029 | 0.00  |
| c_Alphaproteobacteria UMGS1426               | 0.03  | -1.24 |
| f_Ruminococcaceae UMGS203                    | 0.03  | -0.46 |
| f_Lachnospiraceae UMGS894                    | 0.03  | 2.97  |
| g_Staphylococcus 12718_7_23                  | 0.03  | -1.01 |
| o_Clostridiales UMGS134                      | 0.031 | -0.64 |
| c_Mollicutes UMGS221                         | 0.031 | -1.74 |

|                                                     |       |       |
|-----------------------------------------------------|-------|-------|
| c_Mollicutes UMGS66                                 | 0.031 | -3.65 |
| o_Bacteroidales UMGS1365                            | 0.032 | 0.51  |
| f_Ruminococcaceae UMGS159                           | 0.032 | -1.47 |
| s_Clostridium sp. MS1 GCF_000820705                 | 0.032 | -0.78 |
| g_Dialister UMGS359                                 | 0.033 | -2.14 |
| o_Clostridiales UMGS902                             | 0.033 | -0.53 |
| g_Peptoniphilus 20298_3_66                          | 0.033 | -0.65 |
| g_Clostridium UMGS1027                              | 0.033 | -2.81 |
| g_Megasphaera UMGS69                                | 0.033 | -0.91 |
| o_Clostridiales UMGS898                             | 0.034 | -1.55 |
| g_Peptoniphilus 20298_3_36                          | 0.034 | -0.65 |
| g_Campylobacter UMGS142                             | 0.035 | -4.64 |
| o_Bacteroidales UMGS880                             | 0.035 | 3.13  |
| g_Solobacterium UMGS1029                            | 0.035 | -0.57 |
| f_Ruminococcaceae UMGS131                           | 0.035 | -3.58 |
| o_Clostridiales UMGS1389                            | 0.035 | 1.71  |
| o_Clostridiales UMGS214                             | 0.035 | -1.52 |
| o_Clostridiales UMGS285                             | 0.036 | 2.07  |
| g_Solobacterium UMGS886                             | 0.036 | -0.48 |
| f_Ruminococcaceae UMGS598                           | 0.037 | -1.81 |
| g_Veillonella UMGS627                               | 0.038 | -0.49 |
| g_Bacteroides 20287_6_9                             | 0.039 | 0.54  |
| g_Ruminococcus 21673_4_22                           | 0.039 | -1.85 |
| s_Eubacterium dolichum GCF_000154285                | 0.039 | -3.30 |
| o_Clostridiales UMGS1195                            | 0.039 | -0.67 |
| f_Ruminococcaceae UMGS264                           | 0.04  | -2.87 |
| o_Clostridiales 20298_3_39                          | 0.04  | -0.66 |
| g_Parabacteroides UMGS1514                          | 0.04  | 0.86  |
| f_Ruminococcaceae UMGS1668                          | 0.04  | -0.92 |
| g_Olsenella UMGS1887                                | 0.041 | -0.65 |
| s_Parabacteroides sp. 2_1_7 GCF_000157035           | 0.041 | 0.88  |
| UMGS1454                                            | 0.041 | 0.67  |
| g_Phascolartobacterium UMGS1554                     | 0.042 | -0.76 |
| g_Ruminococcus UMGS1601                             | 0.042 | -0.75 |
| g_Pelosinus UMGS1260                                | 0.042 | -0.65 |
| s_Corynebacterium ammoniagenes GCF_001941425        | 0.043 | -0.90 |
| o_Clostridiales UMGS775                             | 0.044 | -1.88 |
| o_Clostridiales UMGS882                             | 0.044 | -0.82 |
| g_Bacteroides UMGS845                               | 0.045 | -0.06 |
| s_Bacteroides neonati GCF_000499785                 | 0.045 | 0.69  |
| s_Acidaminococcus sp. Marseille-P2828 GCF_900095825 | 0.045 | -0.48 |
| g_Actinomyces UMGS520                               | 0.045 | -0.69 |
| g_Clostridium UMGS79                                | 0.046 | 0.74  |
| g_Ruminococcus UMGS526                              | 0.047 | -2.03 |
| o_Clostridiales UMGS1332                            | 0.047 | 1.05  |
| g_Ruminococcus UMGS761                              | 0.047 | -0.69 |
| UMGS951                                             | 0.047 | -4.04 |
| g_Ruminococcus UMGS176                              | 0.047 | -0.86 |
| f_Ruminococcaceae UMGS664                           | 0.048 | -2.51 |
| s_Paenibacillus sp. HGH0039 GCF_000411255           | 0.048 | -0.44 |
| g_Anaerococcus UMGS594                              | 0.048 | -1.31 |
| f_Micrococcaceae UMGS928                            | 0.048 | -1.89 |
| g_Azospirillum UMGS63                               | 0.049 | -0.20 |
| f_Porphyromonadaceae UMGS211                        | 0.049 | 0.55  |
| s_Numidum massiliense GCF_001375555                 | 0.049 | -0.48 |

<sup>1</sup> Species names are formatted as beginning with their closest known taxonomy level assigned to them from s\_:species, g\_:genus, o\_:order, f\_:family, and c\_:class or none when there is no assigned name for the species followed by “|” and the species identifier from the reference database.

<sup>2</sup> only statistically significant results (p<0.05), the statistical significance did not remain after BH adjustment for multiple testing.

<sup>3</sup> calculated as  $\log_2(M_{aGvHD}/M_{NaGvHD})$ , where  $M_{aGvHD}$  and  $M_{NaGvHD}$  are mean species abundance in aGvHD and NaGvHD groups, respectively.

Supplementary Table S4 list of 152 differentially abundant species according to indicator species analyses based on group-equalized point-biserial correlation coefficients (r.g.) Species are ordered by p values in ascending order.

| Species <sup>1</sup>      | p value <sup>2</sup> | Effect size <sup>3</sup> |
|---------------------------|----------------------|--------------------------|
| g_Eggerthella UMGS431     | 0.0004               | -0.27                    |
| o_Clostridiales UMGS792   | 0.0009               | 0.17                     |
| f_Ruminococcaceae UMGS555 | 0.0026               | -0.25                    |

|                                                     |        |       |
|-----------------------------------------------------|--------|-------|
| g_Eggerthella UMGS854                               | 0.0029 | -0.22 |
| g_Bifidobacterium UMGS1405                          | 0.0035 | -0.20 |
| o_Clostridiales 12718_7_41                          | 0.0040 | 0.19  |
| s_Eubacterium bifforme GCF_000156655                | 0.0040 | 0.18  |
| g_Megasphaera UMGS69                                | 0.0040 | -0.21 |
| g_Cryptobacterium UMGS93                            | 0.0040 | -0.23 |
| f_Succinivibrionaceae UMGS157                       | 0.0042 | -0.23 |
| g_Phascolarctobacterium UMGS1554                    | 0.0046 | -0.23 |
| s_Corynebacterium ammoniagenes GCF_001941425        | 0.0047 | -0.22 |
| UMGS1477                                            | 0.0052 | -0.18 |
| g_Streptococcus UMGS1794                            | 0.0053 | -0.19 |
| c_Alphaproteobacteria UMGS1426                      | 0.0057 | -0.23 |
| s_Collinsella stercoris GCF_000156215               | 0.0063 | -0.23 |
| g_Anaerotignum UMGS1552                             | 0.0063 | 0.17  |
| g_Selenomonas UMGS1324                              | 0.0064 | -0.23 |
| g_Pelosinus UMGS1260                                | 0.0068 | -0.24 |
| g_Prevotella UMGS2051                               | 0.0072 | 0.24  |
| g_Blautia UMGS1786                                  | 0.0077 | 0.18  |
| s_Beduini massiliensis GCF_000829905                | 0.0078 | -0.23 |
| g_Cryptobacterium UMGS1745                          | 0.0079 | -0.24 |
| g_Blautia UMGS1010                                  | 0.0080 | 0.18  |
| c_Mollicutes UMGS221                                | 0.0084 | -0.20 |
| UMGS1305                                            | 0.0086 | -0.20 |
| g_Megasphaera UMGS20                                | 0.0089 | -0.22 |
| s_Eubacterium ramulus GCF_000469345                 | 0.0090 | 0.14  |
| g_Anaerococcus UMGS594                              | 0.0090 | -0.20 |
| g_Ruminococcus UMGS1601                             | 0.0091 | -0.23 |
| o_Bacteroidales UMGS880                             | 0.0091 | 0.13  |
| s_Thalassobacillus sp. TM-1 GCF_001368835           | 0.0095 | -0.24 |
| s_Actinomyces ihumii GCF_001457875                  | 0.0095 | -0.20 |
| f_Ruminococcaceae UMGS1668                          | 0.0097 | -0.19 |
| g_Bacteroides UMGS277                               | 0.0102 | 0.13  |
| s_Finegoldia magna GCF_000010185                    | 0.0104 | -0.22 |
| f_Succinivibrionaceae UMGS528                       | 0.0104 | -0.21 |
| s_Bacteroides neonati GCF_000499785                 | 0.0106 | 0.22  |
| o_Clostridiales UMGS1350                            | 0.0108 | -0.22 |
| g_Bacteroides UMGS1654                              | 0.0111 | 0.23  |
| f_Ruminococcaceae UMGS230                           | 0.0118 | -0.22 |
| s_Clostridiales bacterium GCF_001282665             | 0.0120 | -0.21 |
| g_Clostridium UMGS1808                              | 0.0123 | -0.21 |
| s_Bifidobacterium breve GCF_001025175               | 0.0126 | -0.20 |
| s_Bacillus sp. JC6 GCF_000311725                    | 0.0126 | -0.22 |
| g_Parabacteroides UMGS1514                          | 0.0127 | 0.23  |
| g_Bacteroides 13470_2_62                            | 0.0129 | 0.22  |
| s_Bacillus timonensis GCF_000285535                 | 0.0142 | -0.21 |
| s_Olsenella sp. KHD7 GCF_900078545                  | 0.0143 | -0.21 |
| s_Lactobacillus sp. 7_1_47FAA GCF_000227195         | 0.0149 | -0.19 |
| g_Clostridium UMGS1287                              | 0.0150 | -0.18 |
| f_Lachnospiraceae 13470_2_93                        | 0.0157 | -0.21 |
| UMGS1281                                            | 0.0163 | -0.20 |
| g_Exiguobacterium 14672_4_4                         | 0.0168 | -0.21 |
| f_Ruminococcaceae UMGS1071                          | 0.0168 | 0.13  |
| g_Olsenella UMGS1887                                | 0.0169 | -0.20 |
| g_Lactobacillus 12718_7_59                          | 0.0171 | -0.19 |
| g_Sutterella UMGS665                                | 0.0174 | 0.15  |
| c_Alphaproteobacteria UMGS241                       | 0.0174 | 0.12  |
| s_Lachnospiraceae bacterium 6_1_63FAA GCF_000209425 | 0.0175 | 0.14  |
| o_Clostridiales 14207_7_59                          | 0.0176 | -0.18 |
| f_Lachnospiraceae 8080_1_69                         | 0.0178 | 0.19  |
| o_Clostridiales UMGS452                             | 0.0178 | 0.19  |
| g_Parabacteroides UMGS1201                          | 0.0179 | 0.21  |
| s_Clostridium sp. MS1 GCF_000820705                 | 0.0180 | -0.21 |
| f_Lachnospiraceae 13414_6_33                        | 0.0187 | -0.18 |
| g_Pelosinus UMGS495                                 | 0.0193 | -0.21 |
| g_Lactobacillus 12718_7_14                          | 0.0196 | -0.17 |
| s_Cetobacterium somerae GCF_000479045               | 0.0199 | -0.19 |
| o_Clostridiales 20298_3_39                          | 0.0203 | -0.21 |
| o_Clostridiales UMGS1290                            | 0.0209 | -0.19 |

|                                                   |        |       |
|---------------------------------------------------|--------|-------|
| o_Clostridiales UMGS1326                          | 0.0219 | -0.20 |
| o_Clostridiales UMGS821                           | 0.0222 | -0.19 |
| f_Ruminococcaceae UMGS264                         | 0.0224 | -0.19 |
| g_Clostridium UMGS453                             | 0.0230 | -0.20 |
| s_Desulfitobacterium hafniense GCF_000238035      | 0.0230 | -0.19 |
| g_Selenomonas UMGS1522                            | 0.0231 | -0.17 |
| f_Coriobacteriaceae UMGS165                       | 0.0232 | -0.19 |
| g_Veillonella UMGS627                             | 0.0232 | -0.20 |
| g_Blautia UMGS97                                  | 0.0233 | 0.13  |
| f_Erysipelotrichaceae UMGS415                     | 0.0235 | -0.19 |
| g_Clostridium UMGS1027                            | 0.0243 | -0.15 |
| p_Tenericutes UMGS592                             | 0.0245 | -0.20 |
| g_Dysgonomonas UMGS2                              | 0.0247 | 0.14  |
| p_Tenericutes UMGS483                             | 0.0258 | -0.19 |
| f_Ruminococcaceae UMGS1491                        | 0.0259 | -0.20 |
| f_Porphyromonadaceae UMGS1407                     | 0.0261 | 0.20  |
| o_Clostridiales UMGS361                           | 0.0261 | -0.15 |
| s_Kurthia sp. JC30 GCF_000285555                  | 0.0266 | -0.20 |
| g_Peptoniphilus 20298_3_36                        | 0.0271 | -0.19 |
| f_Erysipelotrichaceae UMGS1249                    | 0.0274 | -0.20 |
| g_Desulfovibrio UMGS344                           | 0.0275 | -0.15 |
| f_Veillonellaceae UMGS1478                        | 0.0279 | -0.20 |
| s_Veillonellaceae bacterium GCF_900095855         | 0.0282 | -0.17 |
| o_Opitutales UMGS1490                             | 0.0285 | -0.17 |
| g_Peptoniphilus 20298_3_66                        | 0.0287 | -0.19 |
| s_Odoribacter laneus GCF_000243215                | 0.0289 | 0.15  |
| g_Clostridium UMGS101                             | 0.0303 | -0.19 |
| f_Ruminococcaceae UMGS1775                        | 0.0305 | -0.16 |
| o_Bacteroidales UMGS676                           | 0.0311 | 0.16  |
| g_Eubacterium UMGS192                             | 0.0317 | -0.19 |
| s_Lactobacillus brevis GCF_001433855              | 0.0322 | -0.15 |
| o_Bacteroidales UMGS764                           | 0.0330 | 0.13  |
| f_Lachnospiraceae UMGS1615                        | 0.0331 | -0.17 |
| f_Ruminococcaceae UMGS1858                        | 0.0335 | -0.19 |
| f_Porphyromonadaceae UMGS211                      | 0.0336 | 0.19  |
| f_Lachnospiraceae UMGS1691                        | 0.0336 | -0.19 |
| g_Ruminococcus UMGS739                            | 0.0338 | -0.19 |
| f_Ruminococcaceae UMGS664                         | 0.0340 | -0.15 |
| g_Eubacterium UMGS1529                            | 0.0342 | 0.18  |
| s_Lactobacillus brevis GCF_000159175              | 0.0346 | -0.15 |
| o_Bacteroidales UMGS451                           | 0.0350 | 0.19  |
| f_Rhodospirillaceae UMGS1296                      | 0.0351 | -0.19 |
| g_Fusobacterium UMGS548                           | 0.0351 | -0.18 |
| g_Bacteroides UMGS212                             | 0.0358 | 0.12  |
| g_Lachnobacterium UMGS1119                        | 0.0362 | -0.18 |
| s_Cellulomonas sp. SN7 GCF_900046455              | 0.0364 | -0.17 |
| g_Ruminococcus UMGS1659                           | 0.0364 | -0.17 |
| s_Lascolabacillus massiliensis GCF_001282625      | 0.0379 | 0.19  |
| f_Lachnospiraceae UMGS109                         | 0.0382 | -0.18 |
| s_Kallipyga gabonensis GCF_001286805              | 0.0390 | -0.18 |
| s_Paenibacillus sp. Marseille-P2472 GCF_900086655 | 0.0396 | -0.18 |
| g_Blautia UMGS335                                 | 0.0397 | 0.13  |
| o_Clostridiales UMGS416                           | 0.0397 | -0.17 |
| g_Bacteroides UMGS1647                            | 0.0398 | 0.13  |
| g_Solobacterium UMGS1469                          | 0.0407 | -0.15 |
| g_Ruminococcus UMGS91                             | 0.0409 | -0.15 |
| g_Bacteroides UMGS1416                            | 0.0416 | 0.18  |
| s_Fusobacterium mortiferum GCF_000158195          | 0.0418 | -0.18 |
| s_Sutterella wadsworthensis GCF_000186505         | 0.0418 | -0.17 |
| g_Fusobacterium UMGS539                           | 0.0419 | -0.18 |
| g_Solobacterium UMGS1737                          | 0.0421 | 0.14  |
| o_Clostridiales UMGS913                           | 0.0423 | -0.17 |
| s_Paenibacillus ihumii GCF_001403875              | 0.0426 | -0.18 |
| g_Paenibacillus UMGS122                           | 0.0426 | -0.18 |
| g_Ruminococcus UMGS1243                           | 0.0426 | -0.18 |
| g_Clostridium 12718_7_39                          | 0.0429 | 0.15  |
| g_Blautia 20298_3_81                              | 0.0434 | 0.13  |
| f_Lachnospiraceae UMGS1777                        | 0.0434 | -0.18 |



|                                          |        |       |
|------------------------------------------|--------|-------|
| g_Ruminococcus UMGS1882                  | 0.0434 | 0.18  |
| g_Olsenella UMGS1629                     | 0.0437 | -0.17 |
| g_Phascolartobacterium UMGS1456          | 0.0438 | -0.18 |
| g_Bacillus 17138_5_75                    | 0.0441 | -0.18 |
| g_Prevotella UMGS1007                    | 0.0444 | 0.18  |
| g_Solobacterium UMGS1140                 | 0.0444 | -0.15 |
| o_Clostridiales UMGS1908                 | 0.0451 | -0.17 |
| c_Mollicutes UMGS914                     | 0.0451 | -0.14 |
| g_Clostridium UMGS341                    | 0.0459 | -0.16 |
| s_Bifidobacterium gallicum GCF_000741205 | 0.0471 | -0.16 |
| g_Cloacibacillus UMGS813                 | 0.0478 | -0.16 |
| g_Odoribacter UMGS1049                   | 0.0483 | 0.12  |
| f_Ruminococcaceae UMGS1976               | 0.0487 | -0.17 |

<sup>1</sup> Species names are formatted as beginning with their closest known taxonomy level assigned to them from s\_:species, g\_:genus, o\_:order, f\_:family, and c\_:class or none when there is no assigned name for the species followed by “|” and the species identifier from the reference database.

<sup>2</sup> only statistically significant results ( $p < 0.05$ ), the statistical significance did not remain after BH adjustment for multiple testing.

<sup>3</sup> r.g., positive values can be interpreted as positive correlation with aGvHD and vice versa.

Supplementary Table S5 list of 157 differentially abundant species according to the permutation test against the null hypothesis that the abundance of each species is not higher in one group (aGvHD) than others (NaGvHD). P values are adjusted for multiple testing using Sidak's method. Mean fold change in percentage is also presented as an effect size. Species are ordered by p values in ascending order.

| Species <sup>1</sup>                         | p sidak <sup>2</sup> | Mean fold change <sup>3</sup> | Higher abundant group |
|----------------------------------------------|----------------------|-------------------------------|-----------------------|
| g_Eggerthella UMGS431                        | 0.001                | -45.2                         | NaGvHD                |
| o_Clostridiales UMGS792                      | 0.002                | 1160.2                        | aGvHD                 |
| UMGS1477                                     | 0.002                | -53.7                         | NaGvHD                |
| g_Eggerthella UMGS854                        | 0.002                | -44.3                         | NaGvHD                |
| o_Clostridiales UMGS207                      | 0.003                | -83.6                         | NaGvHD                |
| s_Megamonas funiformis GCF_000245775         | 0.003                | -92.2                         | NaGvHD                |
| c_Mollicutes UMGS221                         | 0.003                | -70.1                         | NaGvHD                |
| f_Ruminococcaceae UMGS555                    | 0.004                | -53.3                         | NaGvHD                |
| s_Corynebacterium ammoniagenes GCF_001941425 | 0.004                | -46.4                         | NaGvHD                |
| f_Ruminococcaceae UMGS1050                   | 0.004                | -88.0                         | NaGvHD                |
| g_Streptococcus UMGS1794                     | 0.005                | -66.2                         | NaGvHD                |
| g_Prevotella UMGS2051                        | 0.005                | 60.7                          | aGvHD                 |
| g_Megasphaera UMGS69                         | 0.005                | -46.8                         | NaGvHD                |
| g_Cryptobacterium UMGS93                     | 0.005                | -36.8                         | NaGvHD                |
| g_Lactobacillus 12718_7_14                   | 0.006                | -73.6                         | NaGvHD                |
| s_Pediococcus acidilactici GCF_000146325     | 0.006                | -95.4                         | NaGvHD                |
| g_Bifidobacterium UMGS1405                   | 0.006                | -55.6                         | NaGvHD                |
| o_Clostridiales 12718_7_41                   | 0.006                | 446.0                         | aGvHD                 |
| f_Ruminococcaceae UMGS677                    | 0.006                | -80.6                         | NaGvHD                |
| s_Bacteroides neonati GCF_000499785          | 0.007                | 61.4                          | aGvHD                 |
| g_Clostridium UMGS1027                       | 0.007                | -85.7                         | NaGvHD                |
| f_Succinivibrionaceae UMGS157                | 0.007                | -45.5                         | NaGvHD                |
| g_Bacteroides UMGS1654                       | 0.007                | 75.9                          | aGvHD                 |
| g_Desulfovibrio UMGS344                      | 0.007                | -95.8                         | NaGvHD                |
| g_Anaerococcus UMGS594                       | 0.007                | -59.6                         | NaGvHD                |
| g_Parabacteroides UMGS1514                   | 0.008                | 80.9                          | aGvHD                 |
| g_Phascolartobacterium UMGS1554              | 0.008                | -41.1                         | NaGvHD                |
| c_Alphaproteobacteria UMGS1426               | 0.008                | -57.6                         | NaGvHD                |
| s_Actinomyces ihumii GCF_001457875           | 0.008                | -50.8                         | NaGvHD                |
| g_Pelosinus UMGS1260                         | 0.008                | -36.1                         | NaGvHD                |
| s_Beduini massiliensis GCF_000829905         | 0.009                | -39.8                         | NaGvHD                |
| g_Parabacteroides UMGS1201                   | 0.010                | 63.2                          | aGvHD                 |
| g_Clostridium UMGS1287                       | 0.010                | -79.3                         | NaGvHD                |
| f_Ruminococcaceae UMGS664                    | 0.010                | -82.4                         | NaGvHD                |
| s_Collinsella stercoris GCF_000156215        | 0.010                | -45.1                         | NaGvHD                |
| s_Eubacterium ramulus GCF_000469345          | 0.010                | 501.2                         | aGvHD                 |
| g_Selenomonas UMGS1324                       | 0.011                | -45.4                         | NaGvHD                |
| g_Megasphaera UMGS20                         | 0.011                | -39.5                         | NaGvHD                |
| o_Clostridiales UMGS452                      | 0.011                | 125.3                         | aGvHD                 |
| UMGS1305                                     | 0.011                | -38.2                         | NaGvHD                |
| f_Ruminococcaceae UMGS1668                   | 0.012                | -47.1                         | NaGvHD                |
| s_Lactobacillus sp. 7_1_47FAA GCF_000227195  | 0.012                | -59.9                         | NaGvHD                |

|                                                 |       |       |        |
|-------------------------------------------------|-------|-------|--------|
| g_Cryptobacterium UMGS1745                      | 0.013 | -34.8 | NaGvHD |
| g_Solobacterium UMGS524                         | 0.013 | -94.4 | NaGvHD |
| s_Lactobacillus brevis GCF_000159175            | 0.013 | -65.8 | NaGvHD |
| s_Finegoldia magna GCF_000010185                | 0.013 | -38.3 | NaGvHD |
| g_Anaerotignum UMGS1552                         | 0.013 | 684.9 | aGvHD  |
| g_Blautia UMGS1786                              | 0.013 | 511.5 | aGvHD  |
| o_Clostridiales UMGS361                         | 0.013 | -66.0 | NaGvHD |
| g_Bacteroides 13470_2_62                        | 0.014 | 57.6  | aGvHD  |
| f_Lachnospiraceae 8080_1_69                     | 0.014 | 222.0 | aGvHD  |
| f_Ruminococcaceae UMGS131                       | 0.014 | -91.6 | NaGvHD |
| s_Clostridiales bacterium GCF_001282665         | 0.014 | -43.3 | NaGvHD |
| g_Blautia UMGS1010                              | 0.014 | 429.1 | aGvHD  |
| g_Ruminococcus UMGS1601                         | 0.015 | -40.6 | NaGvHD |
| f_Succinivibrionaceae UMGS528                   | 0.015 | -53.4 | NaGvHD |
| s_Thalassobacillus sp. TM-1 GCF_001368835       | 0.015 | -34.2 | NaGvHD |
| c_Mollicutes UMGS914                            | 0.015 | -69.0 | NaGvHD |
| s_Helicobacter pullorum GCF_000155495           | 0.016 | -70.0 | NaGvHD |
| g_Megasphaera UMGS14                            | 0.016 | -90.5 | NaGvHD |
| s_Eubacterium bifforme GCF_000156655            | 0.017 | 217.6 | aGvHD  |
| g_Clostridium UMGS1808                          | 0.017 | -48.0 | NaGvHD |
| UMGS1281                                        | 0.018 | -44.3 | NaGvHD |
| s_Bacillus timonensis GCF_000285535             | 0.018 | -46.0 | NaGvHD |
| s_Bifidobacterium breve GCF_001025175           | 0.018 | -72.5 | NaGvHD |
| g_Eubacterium UMGS1529                          | 0.018 | 62.1  | aGvHD  |
| s_Lactobacillus brevis GCF_001433855            | 0.018 | -75.1 | NaGvHD |
| s_Bacillus sp. JC6 GCF_000311725                | 0.018 | -48.8 | NaGvHD |
| g_Olsenella UMGS1887                            | 0.019 | -36.3 | NaGvHD |
| o_Clostridiales UMGS1350                        | 0.019 | -43.3 | NaGvHD |
| s_Lactobacillus helveticus GCF_000160855        | 0.019 | -84.7 | NaGvHD |
| s_Olsenella sp. KHD7 GCF_900078545              | 0.019 | -40.5 | NaGvHD |
| f_Ruminococcaceae UMGS230                       | 0.019 | -54.2 | NaGvHD |
| g_Lactobacillus 12718_7_59                      | 0.019 | -62.2 | NaGvHD |
| o_Clostridiales 14207_7_59                      | 0.019 | -75.0 | NaGvHD |
| g_Staphylococcus 20298_3_3                      | 0.020 | -97.4 | NaGvHD |
| f_Porphyromonadaceae UMGS1407                   | 0.020 | 58.6  | aGvHD  |
| s_Clostridium sp. MS1 GCF_000820705             | 0.021 | -41.6 | NaGvHD |
| g_Selenomonas UMGS1522                          | 0.021 | -51.9 | NaGvHD |
| g_Exiguobacterium 14672_4_4                     | 0.022 | -41.7 | NaGvHD |
| o_Clostridiales UMGS214                         | 0.022 | -65.1 | NaGvHD |
| f_Lachnospiraceae 13414_6_33                    | 0.023 | -67.2 | NaGvHD |
| g_Solobacterium UMGS1469                        | 0.023 | -77.3 | NaGvHD |
| g_Bacteroides UMGS277                           | 0.023 | 348.6 | aGvHD  |
| g_Pelosinus UMGS495                             | 0.024 | -33.0 | NaGvHD |
| o_Clostridiales UMGS1290                        | 0.024 | -48.1 | NaGvHD |
| s_Cetobacterium somerae GCF_000479045           | 0.024 | -40.1 | NaGvHD |
| f_Coriobacteriaceae UMGS165                     | 0.024 | -31.9 | NaGvHD |
| o_Opitutales UMGS1490                           | 0.025 | -51.8 | NaGvHD |
| f_Ruminococcaceae UMGS1775                      | 0.025 | -50.2 | NaGvHD |
| o_Bacteroidales UMGS676                         | 0.025 | 102.9 | aGvHD  |
| f_Lachnospiraceae UMGS794                       | 0.025 | -95.9 | NaGvHD |
| s_Veillonellaceae bacterium GCF_900095855       | 0.025 | -51.2 | NaGvHD |
| f_Ruminococcaceae UMGS598                       | 0.026 | -71.4 | NaGvHD |
| g_Succinoclasticum UMGS663                      | 0.026 | -93.1 | NaGvHD |
| o_Bacteroidales UMGS880                         | 0.026 | 774.3 | aGvHD  |
| o_Clostridiales 20298_3_39                      | 0.026 | -36.7 | NaGvHD |
| s_Lactobacillus ultunensis GCF_000159415        | 0.026 | -66.6 | NaGvHD |
| s_Acetomicrobium hydrogeniformans GCF_000160455 | 0.026 | -40.8 | NaGvHD |
| g_Bacteroides UMGS1416                          | 0.027 | 86.5  | aGvHD  |
| p_Tenericutes UMGS483                           | 0.027 | -47.3 | NaGvHD |
| g_Veillonella UMGS627                           | 0.027 | -28.6 | NaGvHD |
| g_Campylobacter UMGS142                         | 0.027 | -96.0 | NaGvHD |
| s_Acidaminococcus sp. HPA0509 GCF_000411395     | 0.027 | -87.4 | NaGvHD |
| o_Clostridiales UMGS821                         | 0.028 | -39.1 | NaGvHD |
| f_Ruminococcaceae UMGS264                       | 0.028 | -86.3 | NaGvHD |
| f_Erysipelotrichaceae 20298_3_70                | 0.029 | -67.5 | NaGvHD |
| g_Ruminococcus UMGS91                           | 0.029 | -87.1 | NaGvHD |
| f_Lachnospiraceae 13470_2_93                    | 0.029 | -38.2 | NaGvHD |
| f_Ruminococcaceae UMGS198                       | 0.030 | -92.2 | NaGvHD |

|                                                     |       |        |        |
|-----------------------------------------------------|-------|--------|--------|
| f_Ruminococcaceae UMGS1033                          | 0.030 | -95.4  | NaGvHD |
| s_Odoribacter laneus GCF_000243215                  | 0.030 | 111.6  | aGvHD  |
| s_Lascolabacillus massiliensis GCF_001282625        | 0.031 | 36.2   | aGvHD  |
| s_Campylobacter sp. 10_1_50 GCF_000238755           | 0.032 | -99.3  | NaGvHD |
| f_Erysipelotrichaceae UMGS1249                      | 0.032 | -41.8  | NaGvHD |
| s_Desulfitobacterium hafniense GCF_000238035        | 0.033 | -32.5  | NaGvHD |
| f_Erysipelotrichaceae UMGS415                       | 0.034 | -48.9  | NaGvHD |
| g_Prevotella UMGS1430                               | 0.034 | 139.3  | aGvHD  |
| o_Clostridiales UMGS1326                            | 0.034 | -39.7  | NaGvHD |
| p_Tenericutes UMGS592                               | 0.034 | -48.2  | NaGvHD |
| f_Ruminococcaceae UMGS1491                          | 0.034 | -38.1  | NaGvHD |
| o_Clostridiales UMGS1011                            | 0.034 | -86.4  | NaGvHD |
| f_Veillonellaceae UMGS1478                          | 0.034 | -33.7  | NaGvHD |
| g_Clostridium UMGS453                               | 0.035 | -50.1  | NaGvHD |
| g_Cloacibacillus UMGS813                            | 0.036 | -46.7  | NaGvHD |
| s_Coriobacteriaceae bacterium GCF_000311845         | 0.036 | -92.6  | NaGvHD |
| s_Lachnospiraceae bacterium 6_1_63FAA GCF_000209425 | 0.036 | 990.2  | aGvHD  |
| f_Ruminococcaceae UMGS1071                          | 0.036 | 817.6  | aGvHD  |
| g_Ruminococcus UMGS1882                             | 0.036 | 66.1   | aGvHD  |
| f_Porphyromonadaceae UMGS211                        | 0.037 | 45.9   | aGvHD  |
| g_Blautia UMGS1359                                  | 0.037 | 99.3   | aGvHD  |
| g_Bacteroides UMGS901                               | 0.037 | 60.1   | aGvHD  |
| o_Bacteroidales UMGS451                             | 0.037 | 34.8   | aGvHD  |
| c_Alphaproteobacteria UMGS241                       | 0.038 | 3243.6 | aGvHD  |
| f_Lachnospiraceae UMGS1615                          | 0.038 | -41.4  | NaGvHD |
| g_Lactobacillus 12718_7_17                          | 0.039 | -84.2  | NaGvHD |
| s_Kurthia sp. JC30 GCF_000285555                    | 0.039 | -46.9  | NaGvHD |
| g_Blautia UMGS276                                   | 0.040 | 143.7  | aGvHD  |
| g_Treponema UMGS419                                 | 0.040 | -64.1  | NaGvHD |
| c_Clostridia UMGS1322                               | 0.040 | -68.7  | NaGvHD |
| f_Ruminococcaceae UMGS1858                          | 0.040 | -31.8  | NaGvHD |
| g_Peptoniphilus 20298_3_36                          | 0.040 | -36.2  | NaGvHD |
| g_Peptoniphilus 20298_3_66                          | 0.041 | -36.4  | NaGvHD |
| f_Rhodospirillaceae UMGS1296                        | 0.041 | -39.5  | NaGvHD |
| g_Bifidobacterium 20298_3_2                         | 0.041 | -91.2  | NaGvHD |
| g_Clostridium UMGS101                               | 0.042 | -35.9  | NaGvHD |
| g_Prevotella UMGS1007                               | 0.042 | 51.6   | aGvHD  |
| g_Ruminococcus UMGS1243                             | 0.043 | -37.0  | NaGvHD |
| g_Sutterella UMGS665                                | 0.043 | 1380.8 | aGvHD  |
| f_Lachnospiraceae UMGS1691                          | 0.044 | -38.4  | NaGvHD |
| g_Ruminococcus UMGS526                              | 0.044 | -75.4  | NaGvHD |
| o_Clostridiales UMGS1908                            | 0.045 | -45.6  | NaGvHD |
| o_Clostridiales UMGS416                             | 0.045 | -68.3  | NaGvHD |
| g_Blautia UMGS97                                    | 0.047 | 836.2  | aGvHD  |
| g_Clostridium UMGS341                               | 0.047 | -90.8  | NaGvHD |
| o_Clostridiales UMGS913                             | 0.047 | -67.6  | NaGvHD |
| g_Coprococcus UMGS43                                | 0.048 | -88.9  | NaGvHD |

<sup>1</sup> Species names are formatted as beginning with their closest known taxonomy level assigned to them from s\_:species, g\_:genus, o\_:order, f\_:family, and c\_:class or none when there is no assigned name for the species followed by “|” and the species identifier from the reference database.

<sup>2</sup> only statistically significant results ( $p < 0.05$ ), the statistical significance did not remain after BH adjustment for multiple testing.

<sup>3</sup> calculated as  $((M_{aGvHD} - M_{NaGvHD}) / M_{NaGvHD}) * 100$ , where  $M_{aGvHD}$  and  $M_{NaGvHD}$  are mean species abundance in aGvHD and NaGvHD groups, respectively.

Supplementary Table S6 list of 65 differentially abundant species according to indicator species analyses based on group-equalized indicator value (indval.g). Species are ordered by p values in ascending order.

| Species <sup>1</sup>                | Specificity | Fidelity (Sensitivity) | $\sqrt{indval.g}$ | p value <sup>2</sup> |
|-------------------------------------|-------------|------------------------|-------------------|----------------------|
| o_Clostridiales UMGS792             | 0.93        | 1.00                   | 0.96              | 0.0009               |
| g_Bacteroides UMGS1654              | 0.64        | 1.00                   | 0.80              | 0.0024               |
| o_Clostridiales 12718_7_41          | 0.85        | 1.00                   | 0.92              | 0.0029               |
| s_Bacteroides neonati GCF_000499785 | 0.62        | 1.00                   | 0.79              | 0.0030               |
| g_Parabacteroides UMGS1514          | 0.64        | 1.00                   | 0.80              | 0.0033               |
| g_Prevotella UMGS2051               | 0.62        | 0.95                   | 0.76              | 0.0041               |
| g_Parabacteroides UMGS1201          | 0.62        | 1.00                   | 0.79              | 0.0055               |
| o_Clostridiales UMGS452             | 0.69        | 1.00                   | 0.83              | 0.0058               |
| g_Blautia UMGS1010                  | 0.84        | 1.00                   | 0.92              | 0.0064               |
| g_Blautia UMGS1786                  | 0.86        | 1.00                   | 0.93              | 0.0068               |
| g_Anaerotignum UMGS1552             | 0.89        | 1.00                   | 0.94              | 0.0069               |

|                                                     |      |      |      |        |
|-----------------------------------------------------|------|------|------|--------|
| f_Lachnospiraceae 8080_1_69                         | 0.76 | 1.00 | 0.87 | 0.0070 |
| s_Eubacterium ramulus GCF_000469345                 | 0.86 | 1.00 | 0.93 | 0.0071 |
| g_Bacteroides 13470_2_62                            | 0.61 | 1.00 | 0.78 | 0.0075 |
| s_Eubacterium biforme GCF_000156655                 | 0.76 | 1.00 | 0.87 | 0.0080 |
| f_Porphyromonadaceae UMGS1407                       | 0.61 | 0.97 | 0.77 | 0.0094 |
| g_Bacteroides UMGS277                               | 0.82 | 1.00 | 0.90 | 0.0101 |
| g_Eubacterium UMGS1529                              | 0.62 | 1.00 | 0.79 | 0.0105 |
| o_Bacteroidales UMGS880                             | 0.90 | 0.97 | 0.94 | 0.0125 |
| o_Bacteroidales UMGS676                             | 0.67 | 1.00 | 0.82 | 0.0127 |
| g_Bacteroides UMGS1416                              | 0.65 | 1.00 | 0.81 | 0.0137 |
| g_Prevotella UMGS1430                               | 0.71 | 1.00 | 0.84 | 0.0161 |
| s_Lachnospiraceae bacterium 6_1_63FAA GCF_000209425 | 0.92 | 0.97 | 0.94 | 0.0167 |
| s_Lascolabacillus massiliensis GCF_001282625        | 0.58 | 1.00 | 0.76 | 0.0170 |
| c_Alphaproteobacteria UMGS241                       | 0.97 | 1.00 | 0.99 | 0.0171 |
| g_Ruminococcus UMGS1882                             | 0.62 | 1.00 | 0.79 | 0.0172 |
| f_Porphyromonadaceae UMGS211                        | 0.59 | 1.00 | 0.77 | 0.0173 |
| g_Sutterella UMGS665                                | 0.94 | 1.00 | 0.97 | 0.0180 |
| s_Odoribacter laneus GCF_000243215                  | 0.68 | 1.00 | 0.82 | 0.0181 |
| g_Bacteroides UMGS901                               | 0.62 | 1.00 | 0.78 | 0.0184 |
| o_Bacteroidales UMGS451                             | 0.57 | 1.00 | 0.76 | 0.0191 |
| f_Ruminococcaceae UMGS1071                          | 0.90 | 1.00 | 0.95 | 0.0195 |
| g_Blautia UMGS276                                   | 0.71 | 1.00 | 0.84 | 0.0209 |
| g_Blautia UMGS97                                    | 0.90 | 1.00 | 0.95 | 0.0226 |
| g_Blautia UMGS1359                                  | 0.67 | 1.00 | 0.82 | 0.0226 |
| g_Prevotella UMGS1007                               | 0.60 | 1.00 | 0.78 | 0.0227 |
| g_Solobacterium UMGS1737                            | 0.72 | 1.00 | 0.85 | 0.0262 |
| g_Bacteroides UMGS355                               | 0.59 | 1.00 | 0.77 | 0.0275 |
| g_Dysgonomonas UMGS2                                | 0.93 | 1.00 | 0.96 | 0.0276 |
| g_Prevotella UMGS1684                               | 0.70 | 1.00 | 0.83 | 0.0276 |
| g_Bacteroides UMGS1534                              | 0.59 | 1.00 | 0.77 | 0.0305 |
| o_Bacteroidales UMGS764                             | 0.72 | 1.00 | 0.85 | 0.0323 |
| f_Porphyromonadaceae UMGS659                        | 0.65 | 1.00 | 0.81 | 0.0345 |
| g_Bacteroides UMGS1213                              | 0.58 | 1.00 | 0.76 | 0.0359 |
| g_Bacteroides UMGS1647                              | 0.72 | 1.00 | 0.85 | 0.0370 |
| g_Eubacterium UMGS574                               | 0.62 | 1.00 | 0.79 | 0.0381 |
| p_Tenericutes UMGS2065                              | 0.72 | 1.00 | 0.85 | 0.0387 |
| o_Clostridiales UMGS977                             | 0.61 | 1.00 | 0.78 | 0.0393 |
| o_Bacteroidales UMGS1768                            | 0.58 | 1.00 | 0.76 | 0.0395 |
| g_Bacteroides UMGS212                               | 0.95 | 1.00 | 0.98 | 0.0398 |
| g_Eubacterium UMGS562                               | 0.69 | 1.00 | 0.83 | 0.0400 |
| g_Succinatimonas UMGS1092                           | 0.65 | 1.00 | 0.81 | 0.0407 |
| g_Clostridium 12718_7_39                            | 0.92 | 1.00 | 0.96 | 0.0418 |
| g_Blautia UMGS1369                                  | 0.66 | 1.00 | 0.81 | 0.0423 |
| g_Bacteroides UMGS1265                              | 0.63 | 1.00 | 0.79 | 0.0424 |
| g_Blautia 20298_3_81                                | 0.90 | 1.00 | 0.95 | 0.0446 |
| g_Solobacterium UMGS1017                            | 0.62 | 1.00 | 0.79 | 0.0447 |
| g_Bacteroides UMGS1352                              | 0.62 | 1.00 | 0.79 | 0.0448 |
| g_Blautia UMGS335                                   | 0.80 | 1.00 | 0.89 | 0.0454 |
| g_Blautia UMGS967                                   | 0.67 | 1.00 | 0.82 | 0.0454 |
| g_Sutterella UMGS767                                | 0.81 | 1.00 | 0.90 | 0.0458 |
| g_Bacteroides UMGS1205                              | 0.74 | 1.00 | 0.86 | 0.0491 |
| s_Dysgonomonas gadei GCF_000213555                  | 0.67 | 1.00 | 0.82 | 0.0491 |
| g_Solobacterium UMGS695                             | 0.59 | 1.00 | 0.77 | 0.0497 |
| s_Lachnospiraceae bacterium 2_1_46FAA GCF_000209385 | 0.64 | 1.00 | 0.80 | 0.0499 |

<sup>1</sup> Species names are formatted as beginning with their closest known taxonomy level assigned to them from s\_:species, g\_:genus, o\_:order, f\_:family, and c\_:class or none when there is no assigned name for the species followed by “|” and the species identifier from the reference database.

<sup>2</sup> only statistically significant results (p<0.05)

Supplementary Table S7 R packages used for all the analyses described in the article. The codes were compiled based on R version 4.1.2 in RStudio.

| Package | Version | Reference                                                                                                                                                                                 |
|---------|---------|-------------------------------------------------------------------------------------------------------------------------------------------------------------------------------------------|
| abdiv   | 0.2.0   | Kyle Bittinger (2020). abdiv: Alpha and Beta Diversity Measures. R package version 0.2.0. <a href="https://CRAN.R-project.org/package=abdiv">https://CRAN.R-project.org/package=abdiv</a> |

|                 |         |                                                                                                                                                                                                                                                                                                          |
|-----------------|---------|----------------------------------------------------------------------------------------------------------------------------------------------------------------------------------------------------------------------------------------------------------------------------------------------------------|
| arsenal         | 3.6.3   | Ethan Heinzen, Jason Sinnwell, Elizabeth Atkinson, Tina Gunderson and Gregory Dougherty (2021). arsenal: An Arsenal of 'R' Functions for Large-Scale Statistical Summaries. R package version 3.6.3. <a href="https://CRAN.R-project.org/package=arsenal">https://CRAN.R-project.org/package=arsenal</a> |
| boot            | 1.3.28  | Angelo Canty and Brian Ripley (2021). boot: Bootstrap R (S-Plus) Functions. R package version 1.3-28.                                                                                                                                                                                                    |
| broom           | 1.0.0   | David Robinson, Alex Hayes and Simon Couch (2022). broom: Convert Statistical Objects into Tidy Tibbles. R package version 1.0.0. <a href="https://CRAN.R-project.org/package=broom">https://CRAN.R-project.org/package=broom</a>                                                                        |
| confintr        | 0.1.2   | Michael Mayer (2022). confintr: Confidence Intervals. R package version 0.1.2. <a href="https://CRAN.R-project.org/package=confintr">https://CRAN.R-project.org/package=confintr</a>                                                                                                                     |
| CORElearn       | 1.56.0  | Marko Robnik-Sikonja and Petr Savicky (2021). CORElearn: Classification, Regression and Feature Evaluation. R package version 1.56.0. <a href="https://CRAN.R-project.org/package=CORElearn">https://CRAN.R-project.org/package=CORElearn</a>                                                            |
| cowplot         | 1.1.1   | Claus O. Wilke (2020). cowplot: Streamlined Plot Theme and Plot Annotations for 'ggplot2'. R package version 1.1.1. <a href="https://CRAN.R-project.org/package=cowplot">https://CRAN.R-project.org/package=cowplot</a>                                                                                  |
| cvms            | 1.3.4   | Ludvig Renbo Olsen and Hugh Benjamin Zachariae (2022). cvms: Cross-Validation for Model Selection. R package version 1.3.4. <a href="https://CRAN.R-project.org/package=cvms">https://CRAN.R-project.org/package=cvms</a>                                                                                |
| data.table      | 1.14.2  | Matt Dowle and Arun Srinivasan (2021). data.table: Extension of 'data.frame'. R package version 1.14.2. <a href="https://CRAN.R-project.org/package=data.table">https://CRAN.R-project.org/package=data.table</a>                                                                                        |
| DescTools       | 0.99.45 | Andri Signorell et mult. al. (2022). DescTools: Tools for descriptive statistics. R package version 0.99.45.                                                                                                                                                                                             |
| dplyr           | 1.0.9   | Hadley Wickham, Romain François, Lionel Henry and Kirill Müller (2022). dplyr: A Grammar of Data Manipulation. R package version 1.0.9. <a href="https://CRAN.R-project.org/package=dplyr">https://CRAN.R-project.org/package=dplyr</a>                                                                  |
| egg             | 0.4.5   | Baptiste Auguie (2019). egg: Extensions for 'ggplot2': Custom Geom, Custom Themes, Plot Alignment, Labelled Panels, Symmetric Scales, and Fixed Panel Size. R package version 0.4.5. <a href="https://CRAN.R-project.org/package=egg">https://CRAN.R-project.org/package=egg</a>                         |
| EnhancedVolcano | 1.12.0  | Kevin Blighe, Sharmila Rana and Myles Lewis (2021). EnhancedVolcano: Publication-ready volcano plots with enhanced colouring and labeling. R package version 1.12.0. <a href="https://github.com/kevinblighe/EnhancedVolcano">https://github.com/kevinblighe/EnhancedVolcano</a>                         |
| forcats         | 0.5.1   | Hadley Wickham (2021). forcats: Tools for Working with Categorical Variables (Factors). R package version 0.5.1. <a href="https://CRAN.R-project.org/package=forcats">https://CRAN.R-project.org/package=forcats</a>                                                                                     |
| ggforce         | 0.3.3   | Thomas Lin Pedersen (2021). ggforce: Accelerating 'ggplot2'. R package version 0.3.3. <a href="https://CRAN.R-project.org/package=ggforce">https://CRAN.R-project.org/package=ggforce</a>                                                                                                                |
| ggimage         | 0.3.1   | Guangchuang Yu (2022). ggimage: Use Image in 'ggplot2'. R package version 0.3.1. <a href="https://CRAN.R-project.org/package=ggimage">https://CRAN.R-project.org/package=ggimage</a>                                                                                                                     |
| ggplot2         | 3.3.6   | H. Wickham. ggplot2: Elegant Graphics for Data Analysis. Springer-Verlag New York, 2016.                                                                                                                                                                                                                 |
| ggpubr          | 0.4.0   | Alboukadel Kassambara (2020). ggpubr: 'ggplot2' Based Publication Ready Plots. R package version 0.4.0. <a href="https://CRAN.R-project.org/package=ggpubr">https://CRAN.R-project.org/package=ggpubr</a>                                                                                                |
| ggrepel         | 0.9.1   | Kamil Slowikowski (2021). ggrepel: Automatically Position Non-Overlapping Text Labels with 'ggplot2'. R package version 0.9.1. <a href="https://CRAN.R-project.org/package=ggrepel">https://CRAN.R-project.org/package=ggrepel</a>                                                                       |
| ggsignif        | 0.6.3   | Ahlmann-Eltze, C., & Patil, I. (2021). ggsignif: R Package for Displaying Significance Brackets for 'ggplot2'. PsyArxiv. doi:10.31234/osf.io/7awm6                                                                                                                                                       |
| glmnet          | 4.1.4   | Jerome Friedman, Trevor Hastie, Robert Tibshirani (2010). Regularization Paths for Generalized Linear Models via Coordinate Descent. Journal of Statistical Software, 33(1), 1-22. URL <a href="https://www.jstatsoft.org/v33/i01/">https://www.jstatsoft.org/v33/i01/</a> .                             |
| gridExtra       | 2.3     | Baptiste Auguie (2017). gridExtra: Miscellaneous Functions for "Grid" Graphics. R package version 2.3. <a href="https://CRAN.R-project.org/package=gridExtra">https://CRAN.R-project.org/package=gridExtra</a>                                                                                           |
| imbalance       | 1.0.2.1 | Cordón I, García S, Fernández A, Herrera F (2018). "Imbalance: Oversampling algorithms for imbalanced classification in R." Knowledge-Based Systems, 161, 329-341. <a href="https://doi.org/10.1016/j.knosys.2018.07.035">https://doi.org/10.1016/j.knosys.2018.07.035</a>                               |
| indicspecies    | 1.7.12  | De Caceres, M., Legendre, P. (2009). Associations between species and groups of sites: indices and statistical inference. Ecology, URL <a href="http://sites.google.com/site/miqueldecaceres/">http://sites.google.com/site/miqueldecaceres/</a>                                                         |
| infotheo        | 1.2.0.1 | Patrick E. Meyer (2022). infotheo: Information-Theoretic Measures. R package version 1.2.0.1. <a href="https://CRAN.R-project.org/package=infotheo">https://CRAN.R-project.org/package=infotheo</a>                                                                                                      |
| jtools          | 2.2.0   | Long JA (2022). _jtools: Analysis and Presentation of Social Scientific Data_. R package version 2.2.0, <URL: <a href="https://cran.r-project.org/package=jtools">https://cran.r-project.org/package=jtools</a> >.                                                                                       |
| kohonen         | 3.0.11  | Wehrens R, Kruisselbrink J (2018). "Flexible Self-Organizing Maps in kohonen 3.0." _Journal of Statistical Software_, *87*(7), 1-18. doi:10.18637/jss.v087.i07 (URL: <a href="https://doi.org/10.18637/jss.v087.i07">https://doi.org/10.18637/jss.v087.i07</a> ).                                        |
| lares           | 5.1.2   | Bernardo Lares (2022). lares: Analytics & Machine Learning Sidekick. R package version 5.1.2. <a href="https://CRAN.R-project.org/package=lares">https://CRAN.R-project.org/package=lares</a>                                                                                                            |
| lattice         | 0.20.45 | Sarkar, Deepayan (2008) Lattice: Multivariate Data Visualization with R. Springer, New York. ISBN 978-0-387-75968-5                                                                                                                                                                                      |
| lavaan          | 0.6.12  | Yves Rosseel (2012). lavaan: An R Package for Structural Equation Modeling. Journal of Statistical Software, 48(2), 1-36. <a href="https://doi.org/10.18637/jss.v048.i02">https://doi.org/10.18637/jss.v048.i02</a>                                                                                      |
| lme4            | 1.1.30  | Douglas Bates, Martin Maechler, Ben Bolker, Steve Walker (2015). Fitting Linear Mixed-Effects Models Using lme4. Journal of Statistical Software, 67(1), 1-48. doi:10.18637/jss.v067.i01.                                                                                                                |
| magrittr        | 2.0.3   | Stefan Milton Bache and Hadley Wickham (2022). magrittr: A Forward-Pipe Operator for R. R package version 2.0.3. <a href="https://CRAN.R-project.org/package=magrittr">https://CRAN.R-project.org/package=magrittr</a>                                                                                   |
| MASS            | 7.3.54  | Venables, W. N. & Ripley, B. D. (2002) Modern Applied Statistics with S. Fourth Edition. Springer, New York. ISBN 0-387-95457-0                                                                                                                                                                          |
| Matrix          | 1.3.4   | Douglas Bates and Martin Maechler (2021). Matrix: Sparse and Dense Matrix Classes and Methods. R package version 1.3-4. <a href="https://CRAN.R-project.org/package=Matrix">https://CRAN.R-project.org/package=Matrix</a>                                                                                |

|                   |        |                                                                                                                                                                                                                                                                                                                                                                                                                                                                          |
|-------------------|--------|--------------------------------------------------------------------------------------------------------------------------------------------------------------------------------------------------------------------------------------------------------------------------------------------------------------------------------------------------------------------------------------------------------------------------------------------------------------------------|
| mlr               | 2.19.0 | Bischl B, Lang M, Kothhoff L, Schiffner J, Richter J, Studerus E, Casalicchio G, Jones Z (2016). "mlr: Machine Learning in R." <i>_Journal of Machine Learning Research_</i> , *17*(170), 1-5. <URL: <a href="https://jmlr.org/papers/v17/15-066.html">https://jmlr.org/papers/v17/15-066.html</a> >.                                                                                                                                                                    |
| mltools           | 0.3.5  | Ben Gorman (2018). mltools: Machine Learning Tools. R package version 0.3.5. <a href="https://CRAN.R-project.org/package=mltools">https://CRAN.R-project.org/package=mltools</a>                                                                                                                                                                                                                                                                                         |
| outliers          | 0.15   | Lukasz Komsta (2022). outliers: Tests for Outliers. R package version 0.15. <a href="https://CRAN.R-project.org/package=outliers">https://CRAN.R-project.org/package=outliers</a>                                                                                                                                                                                                                                                                                        |
| parallelMap       | 1.5.1  | Bernd Bischl, Michel Lang and Patrick Schratz (2021). parallelMap: Unified Interface to Parallelization Back-Ends. R package version 1.5.1. <a href="https://CRAN.R-project.org/package=parallelMap">https://CRAN.R-project.org/package=parallelMap</a>                                                                                                                                                                                                                  |
| ParamHelpers      | 1.14.1 | Bernd Bischl, Michel Lang, Jakob Richter, Jakob Bossek, Daniel Horn and Pascal Kerschke (2022). ParamHelpers: Helpers for Parameters in Black-Box Optimization, Tuning and Machine Learning. R package version 1.14.1. <a href="https://CRAN.R-project.org/package=ParamHelpers">https://CRAN.R-project.org/package=ParamHelpers</a>                                                                                                                                     |
| PearsonDS         | 1.2.2  | Martin Becker and Stefan Klößner (2022). PearsonDS: Pearson Distribution System. R package version 1.2.2. <a href="https://CRAN.R-project.org/package=PearsonDS">https://CRAN.R-project.org/package=PearsonDS</a>                                                                                                                                                                                                                                                        |
| PERfect           | 1.8.0  | Ekaterina Smirnova and Quy Cao (2021). PERfect: Permutation filtration for microbiome data. R package version 1.8.0. <a href="https://github.com/cxquy91/PERfect">https://github.com/cxquy91/PERfect</a>                                                                                                                                                                                                                                                                 |
| permute           | 0.9.7  | Gavin L. Simpson (2022). permute: Functions for Generating Restricted Permutations of Data. R package version 0.9-7. <a href="https://CRAN.R-project.org/package=permute">https://CRAN.R-project.org/package=permute</a>                                                                                                                                                                                                                                                 |
| pheatmap          | 1.0.12 | Raivo Kolde (2019). pheatmap: Pretty Heatmaps. R package version 1.0.12. <a href="https://CRAN.R-project.org/package=pheatmap">https://CRAN.R-project.org/package=pheatmap</a>                                                                                                                                                                                                                                                                                           |
| phyloseq          | 1.38.0 | phyloseq: An R package for reproducible interactive analysis and graphics of microbiome census data. Paul J. McMurdie and Susan Holmes (2013) PLoS ONE 8(4):e61217.                                                                                                                                                                                                                                                                                                      |
| plyr              | 1.8.7  | Hadley Wickham (2011). The Split-Apply-Combine Strategy for Data Analysis. <i>Journal of Statistical Software</i> , 40(1), 1-29. URL <a href="https://www.jstatsoft.org/v40/i01/">https://www.jstatsoft.org/v40/i01/</a> .                                                                                                                                                                                                                                               |
| powerMediation    | 0.3.4  | Weiliang Qiu (2021). powerMediation: Power/Sample Size Calculation for Mediation Analysis. R package version 0.3.4. <a href="https://CRAN.R-project.org/package=powerMediation">https://CRAN.R-project.org/package=powerMediation</a>                                                                                                                                                                                                                                    |
| purrr             | 0.3.4  | Lionel Henry and Hadley Wickham (2020). purrr: Functional Programming Tools. R package version 0.3.4. <a href="https://CRAN.R-project.org/package=purrr">https://CRAN.R-project.org/package=purrr</a>                                                                                                                                                                                                                                                                    |
| pwr2ppl           | 0.4.0  | Chris Abersson (2022). pwr2ppl: Power Analyses for Common Designs (Power to the People). R package version 0.4.0. <a href="https://CRAN.R-project.org/package=pwr2ppl">https://CRAN.R-project.org/package=pwr2ppl</a>                                                                                                                                                                                                                                                    |
| R                 | 4.1.2  | R Core Team (2021). R: A language and environment for statistical computing. R Foundation for Statistical Computing, Vienna, Austria. URL <a href="https://www.R-project.org/">https://www.R-project.org/</a> .                                                                                                                                                                                                                                                          |
| rcompanion        | 2.4.18 | Salvatore Mangiafico (2022). rcompanion: Functions to Support Extension Education Program Evaluation. R package version 2.4.18. <a href="https://CRAN.R-project.org/package=rcompanion">https://CRAN.R-project.org/package=rcompanion</a>                                                                                                                                                                                                                                |
| readr             | 2.1.2  | Hadley Wickham, Jim Hester and Jennifer Bryan (2022). readr: Read Rectangular Text Data. R package version 2.1.2. <a href="https://CRAN.R-project.org/package=readr">https://CRAN.R-project.org/package=readr</a>                                                                                                                                                                                                                                                        |
| readxl            | 1.4.0  | Hadley Wickham and Jennifer Bryan (2022). readxl: Read Excel Files. R package version 1.4.0. <a href="https://CRAN.R-project.org/package=readxl">https://CRAN.R-project.org/package=readxl</a>                                                                                                                                                                                                                                                                           |
| report            | 0.5.1  | Makowski, D., Ben-Shachar, M.S., Patil, I. & Lüdtke, D. (2020). Automated Results Reporting as a Practical Tool to Improve Reproducibility and Methodological Best Practices Adoption. CRAN. Available from <a href="https://github.com/easystats/report">https://github.com/easystats/report</a> . doi: .                                                                                                                                                               |
| repr              | 1.1.4  | Philipp Angerer, Thomas Kluyver and Jan Schulz (2022). repr: Serializable Representations. R package version 1.1.4. <a href="https://CRAN.R-project.org/package=repr">https://CRAN.R-project.org/package=repr</a>                                                                                                                                                                                                                                                        |
| ResourceSelection | 0.3.5  | Subhash R. Lele, Jonah L. Keim and Peter Solymos (2019). ResourceSelection: Resource Selection (Probability) Functions for Use-Availability Data. R package version 0.3-5. <a href="https://CRAN.R-project.org/package=ResourceSelection">https://CRAN.R-project.org/package=ResourceSelection</a>                                                                                                                                                                       |
| rsvg              | 2.3.1  | Jeroen Ooms (2022). rsvg: Render SVG Images into PDF, PNG, (Encapsulated) PostScript, or Bitmap Arrays. R package version 2.3.1. <a href="https://CRAN.R-project.org/package=rsvg">https://CRAN.R-project.org/package=rsvg</a>                                                                                                                                                                                                                                           |
| scales            | 1.2.0  | Hadley Wickham and Dana Seidel (2022). scales: Scale Functions for Visualization. R package version 1.2.0. <a href="https://CRAN.R-project.org/package=scales">https://CRAN.R-project.org/package=scales</a>                                                                                                                                                                                                                                                             |
| SIAMCAT           | 1.14.0 | Wirbel, J., Zych, K., Essex, M. et al. Microbiome meta-analysis and cross-disease comparison enabled by the SIAMCAT machine learning toolbox. <i>Genome Biol</i> 22, 93 (2021). <a href="https://doi.org/10.1186/s13059-021-02306-1">https://doi.org/10.1186/s13059-021-02306-1</a>                                                                                                                                                                                      |
| sn                | 2.1.0  | Azzalini, A. (2022). The R package 'sn': The Skew-Normal and Related Distributions such as the Skew-t and the SUN (version 2.1.0). URL <a href="http://azzalini.stat.unipd.it/SN/">http://azzalini.stat.unipd.it/SN/</a> , <a href="https://cran.r-project.org/package=sn">https://cran.r-project.org/package=sn</a>                                                                                                                                                     |
| stringr           | 1.4.0  | Hadley Wickham (2019). stringr: Simple, Consistent Wrappers for Common String Operations. R package version 1.4.0. <a href="https://CRAN.R-project.org/package=stringr">https://CRAN.R-project.org/package=stringr</a>                                                                                                                                                                                                                                                   |
| tibble            | 3.1.8  | Kirill Müller and Hadley Wickham (2022). tibble: Simple Data Frames. R package version 3.1.8. <a href="https://CRAN.R-project.org/package=tibble">https://CRAN.R-project.org/package=tibble</a>                                                                                                                                                                                                                                                                          |
| tidyr             | 1.2.0  | Hadley Wickham and Maximilian Girlich (2022). tidyr: Tidy Messy Data. R package version 1.2.0. <a href="https://CRAN.R-project.org/package=tidyr">https://CRAN.R-project.org/package=tidyr</a>                                                                                                                                                                                                                                                                           |
| tidyverse         | 1.3.2  | Wickham H, Averick M, Bryan J, Chang W, McGowan LD, François R, Golemund G, Hayes A, Henry L, Hester J, Kuhn M, Pedersen TL, Miller E, BacheSM, Müller K, Ooms J, Robinson D, Seidel DP, Spinu V, Takahashi K, Vaughan D, Wilke C, Woo K, Yutani H (2019). "Welcome to the tidyverse." <i>_Journal of Open Source Software_</i> , *4*(43), 1686. doi: 10.21105/joss.01686 (URL: <a href="https://doi.org/10.21105/joss.01686">https://doi.org/10.21105/joss.01686</a> ). |
| truncnorm         | 1.0.8  | Olaf Mersmann, Heike Trautmann, Detlef Steuer and Björn Bornkamp (2018). truncnorm: Truncated Normal Distribution. R package version 1.0-8. <a href="https://CRAN.R-project.org/package=truncnorm">https://CRAN.R-project.org/package=truncnorm</a>                                                                                                                                                                                                                      |
| tsutils           | 0.9.3  | Nikolaos Kourentzes (2022). tsutils: Time Series Exploration, Modelling and Forecasting. R package version 0.9.3. <a href="https://CRAN.R-project.org/package=tsutils">https://CRAN.R-project.org/package=tsutils</a>                                                                                                                                                                                                                                                    |

|          |       |                                                                                                                                                                                                                                                                                                                                                                                                                                                                                                                                                                                                                                                                                                                                                                  |
|----------|-------|------------------------------------------------------------------------------------------------------------------------------------------------------------------------------------------------------------------------------------------------------------------------------------------------------------------------------------------------------------------------------------------------------------------------------------------------------------------------------------------------------------------------------------------------------------------------------------------------------------------------------------------------------------------------------------------------------------------------------------------------------------------|
| vegan    | 2.6.2 | Jari Oksanen, Gavin L. Simpson, F. Guillaume Blanchet, Roeland Kindt, Pierre Legendre, Peter R. Minchin, R.B. O'Hara, Peter Solymos, M. Henry H. Stevens, Eduard Szoecs, Helene Wagner, Matt Barbour, Michael Bedward, Ben Bolker, Daniel Borcard, Gustavo Carvalho, Michael Chirico, Miquel De Caceres, Sebastien Durand, Heloisa Beatriz Antoniazzi Evangelista, Rich FitzJohn, Michael Friendly, Brendan Furneaux, Geoffrey Hannigan, Mark O. Hill, Leo Lahti, Dan McGlinn, Marie-Helene Ouellette, Eduardo Ribeiro Cunha, Tyler Smith, Adrian Stier, Cajo J.F. Ter Braak and James Weedon (2022). vegan: Community Ecology Package. R package version 2.6-2. <a href="https://CRAN.R-project.org/package=vegan">https://CRAN.R-project.org/package=vegan</a> |
| WebPower | 0.7   | Zhiyong Zhang and Yujiao Mai (2022). WebPower: Basic and Advanced Statistical Power Analysis. R package version 0.7. <a href="https://CRAN.R-project.org/package=WebPower">https://CRAN.R-project.org/package=WebPower</a>                                                                                                                                                                                                                                                                                                                                                                                                                                                                                                                                       |
| writexl  | 1.4.0 | Jeroen Ooms (2021). writexl: Export Data Frames to Excel 'xlsx' Format. R package version 1.4.0. <a href="https://CRAN.R-project.org/package=writexl">https://CRAN.R-project.org/package=writexl</a>                                                                                                                                                                                                                                                                                                                                                                                                                                                                                                                                                             |

---
